# Supplementary material
Source: PubMed Central journal article supplement (PMC5409476)
Supplement: 10.1074_M116.751255_jbc.M116.751255-1.pdf [file 10.1074_M116.751255_jbc.M116.751255-1.pdf]

## Supporting Information

### Complete Elucidation of the Late Steps of Bafilomycin Biosynthesis in *Streptomyces lohii*

Zhong Li<sup>1,2</sup>, Lei Du<sup>1,2</sup>, Wei Zhang<sup>1</sup>, Xingwang Zhang<sup>1</sup>, Yuanyuan Jiang<sup>1,2</sup>, Kun Liu<sup>1</sup>, Ping Men<sup>1</sup>, Huifang Xu<sup>1</sup>, Jeffrey L. Fortman<sup>3</sup>, David H. Sherman<sup>3</sup>, Bing Yu<sup>4</sup>, Song Gao<sup>4</sup>, and Shengying Li<sup>1\*</sup>

<sup>1</sup>Shandong Provincial Key Laboratory of Synthetic Biology, and CAS Key Laboratory of Biofuels at Qingdao Institute of Bioenergy and Bioprocess Technology, Chinese Academy of Sciences, Qingdao, Shandong 266101,

<sup>2</sup>University of Chinese Academy of Sciences, Beijing 100049, China

<sup>3</sup>Life Sciences Institute, Departments of Medicinal Chemistry, Chemistry, and Microbiology and Immunology, University of Michigan, Ann Arbor, MI 48109, USA.

<sup>4</sup>State Key Laboratory of Oncology in South China, Collaborative Innovation Center for Cancer Medicine, Sun Yat-sen University Cancer Center, Guangzhou, Guangdong 510060, China.

Running title: Post-PKS tailoring steps in bafilomycin biosynthesis

\*To whom correspondence may be addressed. E-mail: lishengying@qibebt.ac.cn

## Table of Contents

|                 |     |
|-----------------|-----|
| Figure S1.....  | S3  |
| Figure S2.....  | S4  |
| Figure S3.....  | S4  |
| Figure S4.....  | S5  |
| Figure S5.....  | S6  |
| Figure S6.....  | S7  |
| Figure S7.....  | S7  |
| Figure S8.....  | S7  |
| Figure S9.....  | S8  |
| Figure S10..... | S8  |
| Figure S11..... | S8  |
| Figure S12..... | S9  |
| Figure S13..... | S10 |
| Figure S14..... | S10 |
| Figure S15..... | S10 |
| Figure S16..... | S11 |
| Figure S17..... | S11 |
| Figure S18..... | S12 |
| Figure S19..... | S12 |
| Figure S20..... | S13 |
| Figure S21..... | S13 |
| Figure S22..... | S14 |
| Table S1.....   | S14 |
| Table S2.....   | S15 |
| Table S3.....   | S15 |

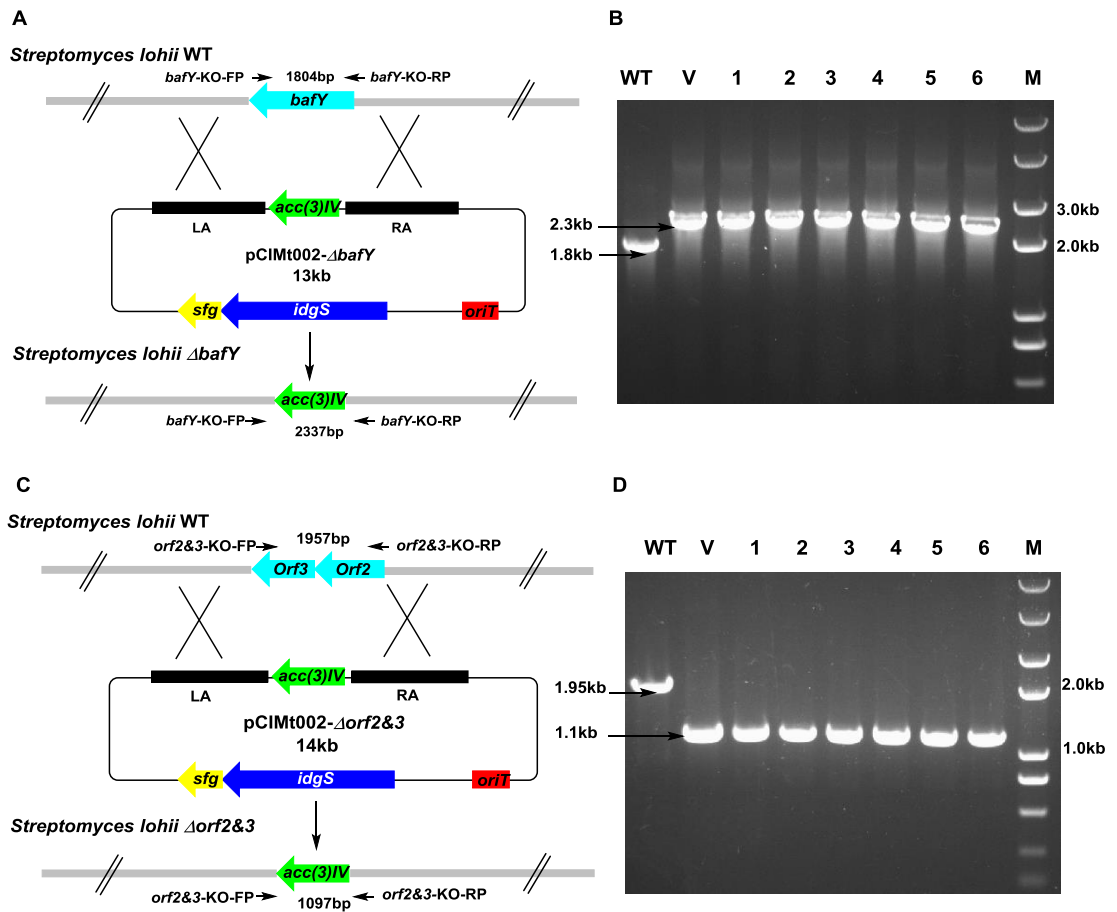

**Figure S1. Inactivation of *bafY* and *orf2&orf3*.** (A) Construction of the *bafY* inactivation mutant *S. lohii*  $\Delta bafY$ . (B) PCR confirmation of the double-crossover mutants. WT: *S. lohii* wild type; M: DNA marker; V: pCIMt002- $\Delta bafY$ ; 1-6: *bafY* inactivation mutants. (C) Construction of the *orf2* and *orf3* inactivation mutant *S. lohii*  $\Delta orf2\&orf3$ . (D) PCR confirmation of the double-crossover mutants. WT: *S. lohii* wild type; M: DNA marker; V: pCIMt002- $\Delta orf2\&orf3$ ; 1-6: *orf2* and *orf3* inactivation mutants. Note: LA: left homologous arm; RA: right homologous arm.

|                  |                                |                                                 |     |
|------------------|--------------------------------|-------------------------------------------------|-----|
| N-truncated Orf3 |                                | MVRRHFDPVSGSPYWLQAS                             | 20  |
| BafCI            | MTAATRADPDDR IARWLD FDLDTWTRTV | VRRHFDPVSGSPYWLQAP                              | 47  |
| P1               | MTAATRADPDAR IARWLE FDLDEWTRTV | VRRHFDPVSGSPYWLQAS                              | 47  |
| P2               | MTAATRADPDAR IARWLD FDLVWTRTV  | VRRHFDPVSGSPYWLQAP                              | 47  |
| Consensus        |                                | vrrhfdpvsqspyl qa                               |     |
| N-truncated Orf3 |                                | RLDFDPRDITRYDQLGAFGPFPLDRLRE                    | 67  |
| BafCI            | RLDFDPRDITRYDQLGAFGPFPLDRLRH   | EDPADLVPLSVPRPLAGRV                             | 94  |
| P1               | RLDFDPRDITRYDQLGAFGPFPLDRLRE   | EDPADLVPLSVPRPLAGRV                             | 94  |
| P2               | RLDFDPRDITRYDQLGAFGPFPLDRLRH   | EDPADLVPLSVPRPLAGRV                             | 94  |
| Consensus        |                                | rldfdprditrydqlgafgpfpldrle edpadlvplsvprplagr  |     |
| N-truncated Orf3 |                                | WDSGGTTGTPCRAFYTDMLLHRAI                        | 114 |
| BafCI            | WDSGGTTGTPCRAFYTDMLLHRAV       | WRRWSFVREGFAPGRTWLQATP                          | 141 |
| P1               | WDSGGTTGTPCRAFYTDMLLHRAI       | WRRWSFVREGFAPGRTWLQATP                          | 141 |
| P2               | WDSGGTTGTPCRAFYTDMLLHRAV       | WRRWSFVREGFAPGRTWLQATP                          | 141 |
| Consensus        |                                | wdsggttgtpcrafytpdmlhrai wrrwsfvregfapgrtwlqatp |     |

**Figure S2.** The protein sequence alignment of the *N*-terminal 110-140 amino acids of the previously annotated Orf3 and some homologous proteins with sequence identity >90%. *Note:* BafCI (GenBank accession number: AGK25205.1), P1 (WP\_028419150.1P2), and P2 (WP\_028419150.1). The amino acids highlighted in red stand for 100% homology; the residues highlighted in green stand for 75% < homology <100%.

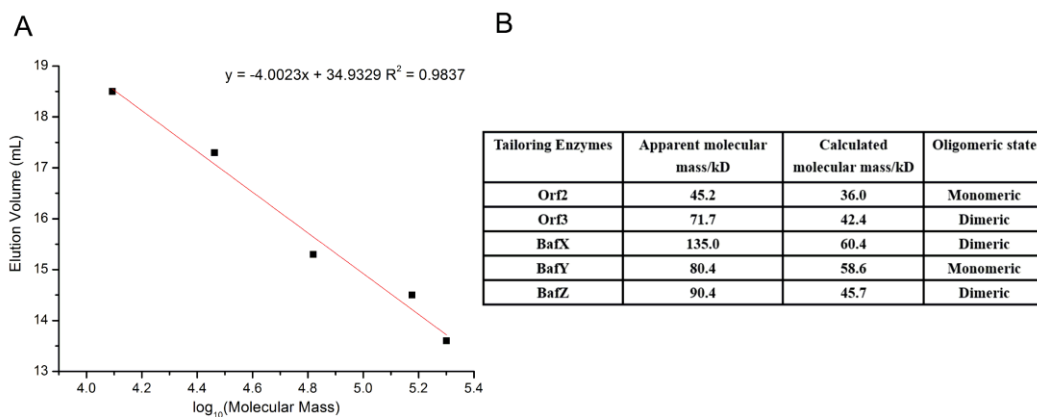

**Figure S3.** Gel filtration analysis for oligomeric state determination of all Baf tailoring enzymes. (A) The standard curve of gel filtration chromatography. (B) The calculation of the apparent molecular mass of each tailoring enzyme. Experimentally, purified BafX, BafY, BafZ, Orf2, and Orf3 were individually applied to size-exclusion chromatography using a Superdex200 10/300 column (GE Healthcare) in a buffer containing 20 mM HEPES, 150 mM NaCl, and 1 mM DTT, pH 7.5. The apparent molecular mass of each sample was calculated based on the calibration of the column using protein standards.

|           |                     |           |               |    |         |       |        |     |     |     |   |   |   |   |   |     |   |   |   |   |     |     |   |   |   |   |    |   |   |   |     |   |     |     |   |   |   |     |   |     |     |     |     |     |
|-----------|---------------------|-----------|---------------|----|---------|-------|--------|-----|-----|-----|---|---|---|---|---|-----|---|---|---|---|-----|-----|---|---|---|---|----|---|---|---|-----|---|-----|-----|---|---|---|-----|---|-----|-----|-----|-----|-----|
| Orf3      | MTAATRADPDARIARWLDT | DLDEWTRTV | VRR           | HF | D       | PVS   | GSPY   | W   | 42  |     |   |   |   |   |   |     |   |   |   |   |     |     |   |   |   |   |    |   |   |   |     |   |     |     |   |   |   |     |   |     |     |     |     |     |
| EhpF      | MKDYSLEIDAVMKAQIND  | TNNFVQAL  | MRW           | HF | SKET    | GSPF  | W      | 41  |     |     |   |   |   |   |   |     |   |   |   |   |     |     |   |   |   |   |    |   |   |   |     |   |     |     |   |   |   |     |   |     |     |     |     |     |
| EsmB1     | MSREANPVLDPFDVRP    | DDEFIQAA  | MDW           | HF | SPET    | GSPY  | W      | 40  |     |     |   |   |   |   |   |     |   |   |   |   |     |     |   |   |   |   |    |   |   |   |     |   |     |     |   |   |   |     |   |     |     |     |     |     |
| GriC      |                     |           | MAW           | HF | DPKT    | GSPF  | W      | 14  |     |     |   |   |   |   |   |     |   |   |   |   |     |     |   |   |   |   |    |   |   |   |     |   |     |     |   |   |   |     |   |     |     |     |     |     |
| Consensus |                     |           |               | hf |         | gsp   | w      |     |     |     |   |   |   |   |   |     |   |   |   |   |     |     |   |   |   |   |    |   |   |   |     |   |     |     |   |   |   |     |   |     |     |     |     |     |
|           |                     |           |               |    |         |       |        |     |     |     |   |   |   |   |   |     |   |   |   |   |     |     |   |   |   |   |    |   |   |   |     |   |     |     |   |   |   |     |   |     |     |     |     |     |
| Orf3      | LGQASRLD            | FDP       | RDITRYDQLGAFG | P  | FPLDR   | LR    | EEDPAD | L   | VPL | 84  |   |   |   |   |   |     |   |   |   |   |     |     |   |   |   |   |    |   |   |   |     |   |     |     |   |   |   |     |   |     |     |     |     |     |
| EhpF      | LGMREQLN            | FDP       | IKDKTINDLR    | F  | SDISHCL | LR    | QEPVAN | L   | VPL | 83  |   |   |   |   |   |     |   |   |   |   |     |     |   |   |   |   |    |   |   |   |     |   |     |     |   |   |   |     |   |     |     |     |     |     |
| EsmB1     | LERAKKLD            | FDP       | RADVTSHQDL    | QL | FPNVNEL | LR    | DVPAQD | L   | VPR | 82  |   |   |   |   |   |     |   |   |   |   |     |     |   |   |   |   |    |   |   |   |     |   |     |     |   |   |   |     |   |     |     |     |     |     |
| GriC      | QEQRKLE             | FDP       | RKDVRTVEDL    | TL | FPNVDEL | LR    | DARIED | L   | VPR | 56  |   |   |   |   |   |     |   |   |   |   |     |     |   |   |   |   |    |   |   |   |     |   |     |     |   |   |   |     |   |     |     |     |     |     |
| Consensus |                     | l fdp     |               |    |         | lr    |        | lvp |     |     |   |   |   |   |   |     |   |   |   |   |     |     |   |   |   |   |    |   |   |   |     |   |     |     |   |   |   |     |   |     |     |     |     |     |
|           |                     |           |               |    |         |       |        |     |     |     |   |   |   |   |   |     |   |   |   |   |     |     |   |   |   |   |    |   |   |   |     |   |     |     |   |   |   |     |   |     |     |     |     |     |
| Orf3      | SVPRPLAGR...        | VW        | SGGTTG        | TP | CR      | AFYTP | D      | M   | L   | H   | R | A | I | W | R | 122 |   |   |   |   |     |     |   |   |   |   |    |   |   |   |     |   |     |     |   |   |   |     |   |     |     |     |     |     |
| EhpF      | GLPADSHPQ...        | VYE       | SGGTTG        | AP | KY      | V     | V      | A   | Y   | D   | A | W | I | E | A | L   | S | W | R | M | 121 |     |   |   |   |   |    |   |   |   |     |   |     |     |   |   |   |     |   |     |     |     |     |     |
| EsmB1     | CYDAPDVVG...        | VYE       | SGGTTG        | AP | KR      | V     | V      | C   | L   | A   | D | W | M | D | R | V   | V | A | W | S | V   | 120 |   |   |   |   |    |   |   |   |     |   |     |     |   |   |   |     |   |     |     |     |     |     |
| GriC      | CYGGPDRLSRPPV       | VGE       | SGGTTG        | AP | KR      | V     | F      | V   | L   | P   | D | V | R | E | Q | S   | W | A | W | Y | Y   | 98  |   |   |   |   |    |   |   |   |     |   |     |     |   |   |   |     |   |     |     |     |     |     |
| Consensus |                     | v         | sggttg        | p  |         |       |        |     |     |     |   |   |   |   |   |     |   |   |   | w |     |     |   |   |   |   |    |   |   |   |     |   |     |     |   |   |   |     |   |     |     |     |     |     |
|           |                     |           |               |    |         |       |        |     |     |     |   |   |   |   |   |     |   |   |   |   |     |     |   |   |   |   |    |   |   |   |     |   |     |     |   |   |   |     |   |     |     |     |     |     |
| Orf3      | WSFVREGFAP          | G         | R             | T  | W       | L     | Q      | A   | T   | P   | T | G | P | H | L | I   | G | N | G | V | R   | E   | V | S | E | L | H  | A | G | Q | V   | Y | A   | 164 |   |   |   |     |   |     |     |     |     |     |
| EhpF      | SGYQHRPGRPS         | G         | N             | T  | L       | A     | A      | I   | P   | T   | G | P | H | I | V | G   | A | I | N | K | E   | R   | A | L | R | L | G  | G | M | F | F   | S | 163 |     |   |   |   |     |   |     |     |     |     |     |
| EsmB1     | ANLDAHCFPRGAN       | W         | L             | G  | V       | T     | P      | T   | G   | P   | H | V | V | G | E | L   | F | S | R | S | A   | A   | A | H | G | S | L  | S | F | P | 162 |   |     |     |   |   |   |     |   |     |     |     |     |     |
| GriC      | NRLVEHGIAAG         | D         | N             | W  | L       | G     | I      | M   | P   | A   | G | P | H | M | A | G   | I | L | A | Q | D   | T   | A | Q | R | F | G  | G | I | F | F   | T | 140 |     |   |   |   |     |   |     |     |     |     |     |
| Consensus |                     |           |               |    | l       |       |        |     | p   | gph |   |   | g |   |   |     |   |   |   |   |     |     |   |   |   |   |    |   |   |   |     |   |     |     |   |   |   |     |   |     |     |     |     |     |
|           |                     |           |               |    |         |       |        |     |     |     |   |   |   |   |   |     |   |   |   |   |     |     |   |   |   |   |    |   |   |   |     |   |     |     |   |   |   |     |   |     |     |     |     |     |
| Orf3      | V                   | D         | D             | P  | R       | W     | V      | K   | R   | L   | I | R | A | G | R | L   | A | E | V | D | D   | Y   | T | H | L | L | E  | Q | I | T | D   | V | L   | R   | Q | G | R | V   | H | Y   | 206 |     |     |     |
| EhpF      | I                   | D         | D             | P  | R       | W     | V      | K   | R   | S   | L | S | E | G | D | T   | A | T | V | R | K   | Y   | T | H | L | V | D  | Q | V | Q | N   | T | L   | M   | N | Q | D | I   | R | F   | 205 |     |     |     |
| EsmB1     | V                   | D         | D             | P  | R       | W     | V      | K   | R   | L   | I | A | E | G | K | T   | D | Q | A | D | A   | Y   | A | E | H | V | D  | Q | A | A | F   | V | L   | R   | T | Q | D | I   | G | V   | 204 |     |     |     |
| GriC      | V                   | D         | F             | D  | P       | R     | W      | A   | K   | L   | V | I | G | R | G | A   | V | D | E | A | N   | A   | Y | I | T | H | L  | V | N | Q | I   | E | W   | I   | L | R | S | Q   | D | I   | R   | V   | 182 |     |
| Consensus | d                   | dprw      | k             |    |         |       |        |     |     |     | g |   |   |   |   |     |   |   |   |   |     | y   | h |   | q |   |    |   |   |   |     |   |     |     |   |   |   |     |   |     |     |     |     |     |
|           |                     |           |               |    |         |       |        |     |     |     |   |   |   |   |   |     |   |   |   |   |     |     |   |   |   |   |    |   |   |   |     |   |     |     |   |   |   |     |   |     |     |     |     |     |
| Orf3      | LNT                 | TP        | A             | L  | Q       | A     | L      | C   | R   | H   | R | . | . | P | E | L   | V | A | A | L | D   | G   | V | R | L | S | G  | T | Q | I | S   | A | D   | M   | Y | R | T | 245 |   |     |     |     |     |     |
| EhpF      | LVT                 | TP        | P             | V  | L       | R     | E      | L   | L   | K   | R | P | E | V | V | L   | Q | M | K | Q | S   | L   | A | Q | I | T | L  | G | G | T | E   | L | N   | L   | D | E | I | K   | F | 247 |     |     |     |     |
| EsmB1     | MAI                 | TP        | P             | L  | L       | E     | R      | L   | T   | R   | R | D | E | L | V | D   | L | V | N | R | K   | V   | R | A | I | R | W  | G | G | T | Q   | M | D   | A   | D | S | R | Y   | L | 246 |     |     |     |     |
| GriC      | MVI                 | TP        | P             | L  | L       | E     | A      | V   | C   | R   | R | D | H | L | V | D   | L | I | N | E | K   | V   | N | T | V | I | Y  | G | G | T | S   | M | D   | E   | D | T | R | H   | L | 224 |     |     |     |     |
| Consensus |                     | tp        |               |    |         |       |        |     |     |     |   |   |   |   |   |     |   |   |   |   |     |     |   |   |   |   | gt |   |   |   |     |   |     |     |   |   |   |     |   |     |     |     |     |     |
|           |                     |           |               |    |         |       |        |     |     |     |   |   |   |   |   |     |   |   |   |   |     |     |   |   |   |   |    |   |   |   |     |   |     |     |   |   |   |     |   |     |     |     |     |     |
| Orf3      | FT                  | T         | A             | L  | R       | G     | G      | I   | C   | G   | L | T | . | Y | G | N   | T | . | . | F | G   | N   | A | C | L | D | I  | E | R | D | G   | E | L   | I   | S | Y | V | P   | N | Y   | 284 |     |     |     |
| EhpF      | I                   | A         | S             | E  | I       | L     | P      | D   | C   | E   | F | S | A | S | Y | G   | S | T | S | A | L   | G   | V | S | R | S | L  | L | I | T | S   | E | S   | Q   | Q | V | I | D   | S | F   | S   | 289 |     |     |
| EsmB1     | Y                   | R         | T             | E  | V       | F     | P      | D   | T   | T   | L | Y | G | H | Y | G   | S | T | M | I | L   | G   | I | A | G | Q | R  | P | G | L | G   | D | D   | D   | P | C | V | F   | D | T   | F   | S   | 288 |     |
| GriC      | F                   | R         | T             | E  | L       | F     | P      | Q   | I   | N   | F | V | S | I | E | G   | S | T | M | I | F   | C   | A | M | P | E | R  | P | D | S | P   | A | D   | E   | S | P | V | F   | D | P   | P   | S   | 266 |     |
| Consensus |                     |           |               |    |         |       |        |     |     |     |   |   |   |   | g | t   |   |   |   |   |     |     |   |   |   |   |    |   |   |   |     |   |     |     |   |   |   |     |   |     |     |     |     |     |
|           |                     |           |               |    |         |       |        |     |     |     |   |   |   |   |   |     |   |   |   |   |     |     |   |   |   |   |    |   |   |   |     |   |     |     |   |   |   |     |   |     |     |     |     |     |
| Orf3      | P                   | Q         | V             | T  | M       | A     | V      | V   | D   | R   | S | D | L | S | T | P   | V | A | P | G | T   | V   | G | R | V | R | L  | T | V | L | H   | E | D   | L   | F | L | P | N   | I | L   | E   | R   | 326 |     |
| EhpF      | P                   | F         | I             | T  | Y       | D     | V      | V   | .   | S   | I | T | A | Q | T | V   | E | Y | G | E | R   | G   | N | V | I | V | T  | H | L | S | P   | W | A   | F   | Y | P | R | V   | A | E   | R   | 330 |     |     |
| EsmB1     | P                   | Y         | I             | T  | F       | S     | V      | N   | .   | P   | E | T | R | K | T | V   | P | Y | G | E | R   | G   | R | V | M | N | H  | V | S | K | S   | L | F   | L   | P | N | N | L   | E | R   | 329 |     |     |     |
| GriC      | P                   | F         | S             | M  | F       | S     | V      | I   | D   | .   | P | D | T | G | K | N   | V | P | Y | G | E   | R   | G | Q | V | L | T  | H | L | T | R   | N | L   | F   | L | P | N | L   | D | R   | 307 |     |     |     |
| Consensus | p                   |           |               |    |         |       | v      |     |     |     |   |   |   |   |   | v   |   |   |   | g |     | g   | v |   |   |   |    |   |   |   |     |   |     |     |   | f | p |     |   | r   |     |     |     |     |
|           |                     |           |               |    |         |       |        |     |     |     |   |   |   |   |   |     |   |   |   |   |     |     |   |   |   |   |    |   |   |   |     |   |     |     |   |   |   |     |   |     |     |     |     |     |
| Orf3      | D                   | Q         | A             | L  | R       | H     | P      | .   | T   | D   | H | W | P | T | D | G   | V | A | N | I | R   | P   | L | Q | I | T | S  | S | . | P | E   | G | L   |     |   |   |   |     |   |     |     |     | 358 |     |
| EhpF      | D                   | T         | A             | I  | R       | L     | P      | G   | V   | S   | G | F | A | G | D | R   | L | A | D | I | E   | P   | L | K | I | S | E  | G | R | K | V   | I | E   | G   | V |   |   |     |   |     |     |     |     | 365 |
| EsmB1     | D                   | L         | A             | T  | R       | I     | A      | P   | L   | P   | G | Q | I | G | D | A   | V | A | D | I | A   | P   | V | T | H | F | E  | D | E | A | V   | I | E   | G   | V |   |   |     |   |     |     |     |     | 364 |
| GriC      | D                   | T         | G             | I  | R       | H     | P      | H   | R   | L   | G | L | P | G | D | A   | V | S | E | F | K   | P   | V | R | E | F | G  | A | A | P | V   | I | E   | G   | V |   |   |     |   |     |     |     |     | 342 |
| Consensus | d                   |           |               |    |         |       | r      |     |     |     |   |   |   |   | d |     |   |   |   |   | p   |     |   |   |   |   |    |   |   |   |     |   |     |     |   |   |   |     |   |     |     |     |     |     |

**Figure S4. Protein sequence alignment of Orf3 with EphF, EsmB1 and GriC.** The amino acids highlighted in red stand for 100% homology; the residues highlighted in green stand for 75% < homology <100%; ■ denotes the key residues of Orf3 involved in ATP-binding; ● denotes the arginine residues of Orf3 related to substrate-binding; *p*-loop, substrate binding site; the ATP binding sites are boxed.

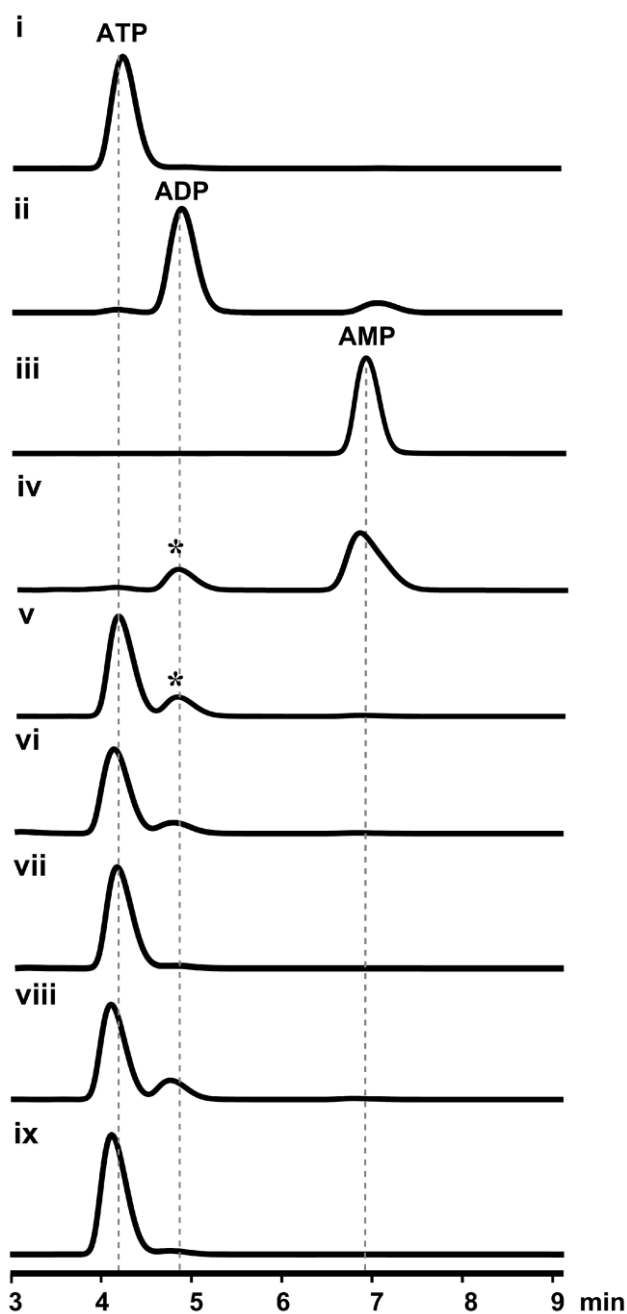

**Figure S5.** HPLC analysis (250 nm) of the ATP transformation by Orf3 or BafY. Trace (i): ATP standard. Trace (ii): ADP standard. Trace (iii): AMP standard. Trace (iv): 40  $\mu$ M Orf3 + 10 mM  $MgCl_2$  + 1 mM disodium fumarate + 1 mM ATP. Trace (v): the negative control for trace iii, in which Orf3 was boiling inactivated. Trace (vi): 40  $\mu$ M BafY + 10 mM  $MgCl_2$  + 200  $\mu$ M **2** + 1 mM ATP. Trace (vii): the negative control for trace vi, in which BafY was boiling inactivated. Trace (viii): 40  $\mu$ M BafY + 10 mM  $MgCl_2$  and 1mM ATP. Trace (ix): the negative control for trace viii, in which BafY was boiling inactivated. *Note:* all reactions were carried out at 28°C for 12 h. The HPLC analysis was performed on a Waters Atlantis® T3 column (2.1  $\times$  150 mm) with isocratic 100 % 50 mM  $KH_2PO_4$  buffer (pH= 6.0) at a flow rate of 0.25 ml/min for 10 min. The asterisk stands for the artifact (coincidentally with the same retention time of ADP) in Orf3 preparation.

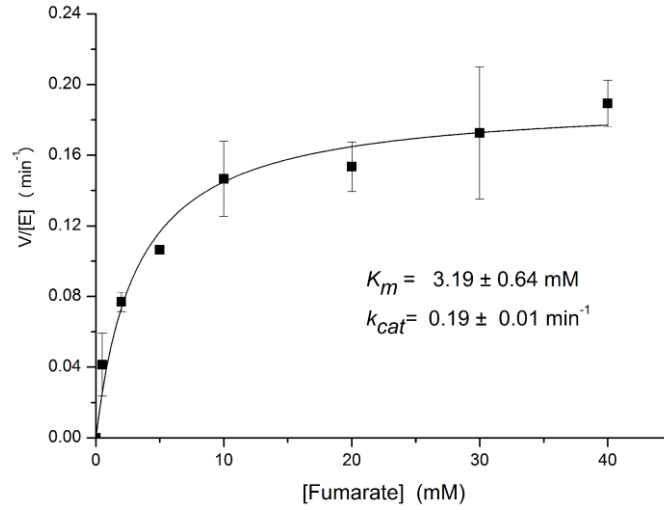

**Figure S6. The kinetic curve of Orf3 using fumarate as substrate.**

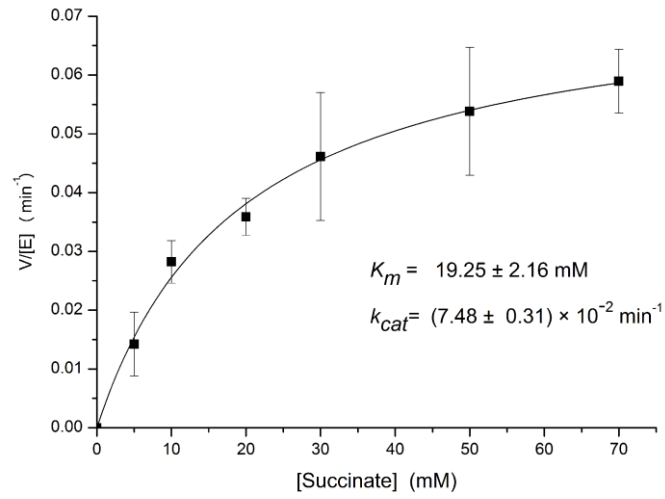

**Figure S7. The kinetic curve of Orf3 using succinate as substrate.**

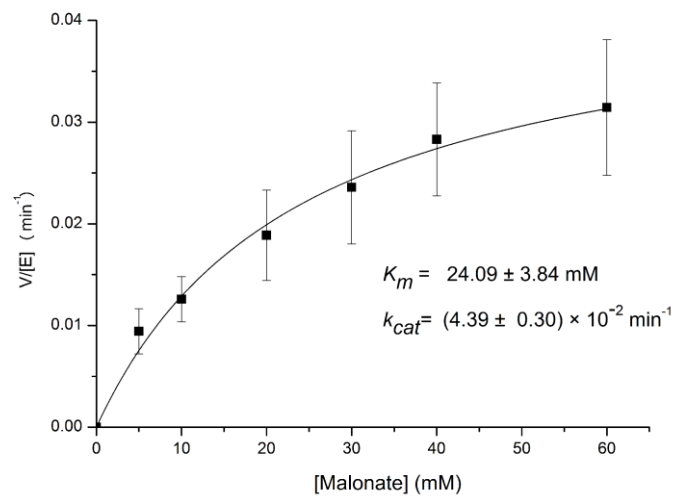

**Figure S8. The kinetic curve of Orf3 using malonate as substrate.**

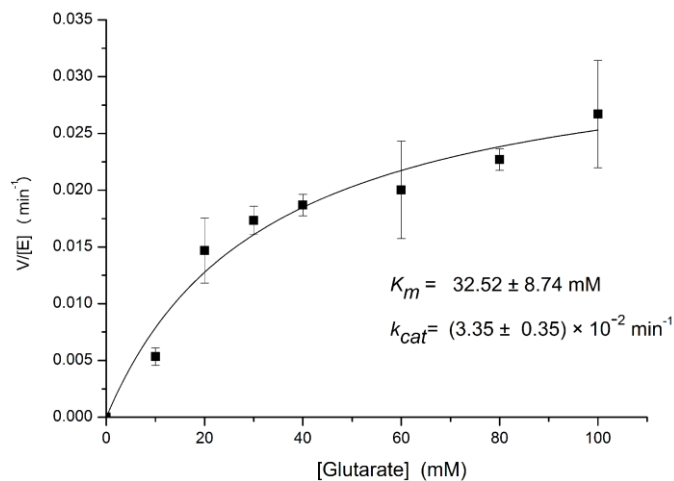

**Figure S9. The kinetic curve of Orf3 using glutarate as substrate.**

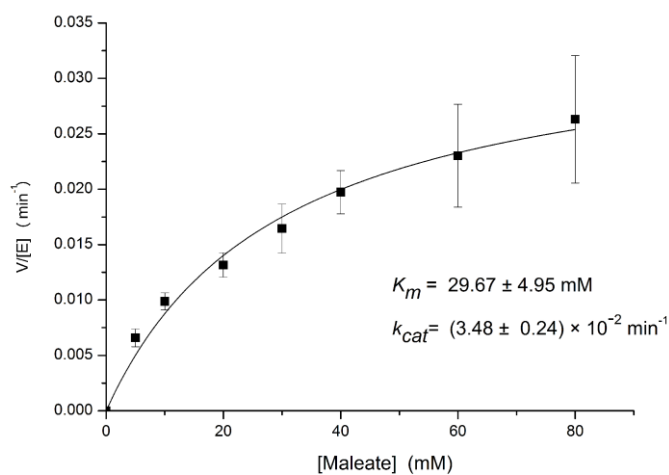

**Figure S10. The kinetic curve of Orf3 using maleate as substrate.**

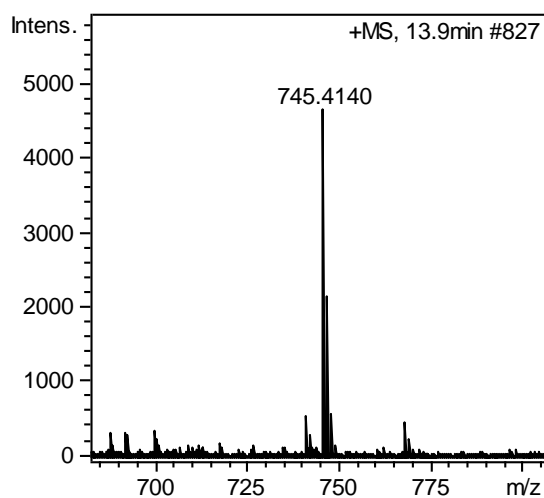

**Figure S11. HRMS of Compound 4 ( $[M+Na]^+$ : *obs.* 745.4140 *calc.* 745.4139)**



|           |           |             |                   |           |       |         |           |          |      |       |       |    |    |    |    |     |    |      |    |     |    |    |     |    |   |   |    |   |   |    |    |   |   |   |    |   |   |   |   |   |     |     |     |     |     |     |     |
|-----------|-----------|-------------|-------------------|-----------|-------|---------|-----------|----------|------|-------|-------|----|----|----|----|-----|----|------|----|-----|----|----|-----|----|---|---|----|---|---|----|----|---|---|---|----|---|---|---|---|---|-----|-----|-----|-----|-----|-----|-----|
| BafY      | MPSNET    | YVSQILQVISA | EP                | PKV       | VVLS  | WRDRTLT | AAELTTLV  | 40       |      |       |       |    |    |    |    |     |    |      |    |     |    |    |     |    |   |   |    |   |   |    |    |   |   |   |    |   |   |   |   |   |     |     |     |     |     |     |     |
| Orf33     | MTPQDHWW  | SASQS       | VSDILSVFAAA       | PN        | AVN   | WRGETAS | GGELISV   | 47       |      |       |       |    |    |    |    |     |    |      |    |     |    |    |     |    |   |   |    |   |   |    |    |   |   |   |    |   |   |   |   |   |     |     |     |     |     |     |     |
| AusD1     | MVVPDGWWS | RRHRG       | YAARIMSALD        | AG        | PT    | AVH     | WRGRPVP   | AGEFARTV | 47   |       |       |    |    |    |    |     |    |      |    |     |    |    |     |    |   |   |    |   |   |    |    |   |   |   |    |   |   |   |   |   |     |     |     |     |     |     |     |
| MoeB4     | MSSNENY   | VRRVLEALASD | PR                | I         | AL    | WADG    | EETAGQVSR | AV       | 40   |       |       |    |    |    |    |     |    |      |    |     |    |    |     |    |   |   |    |   |   |    |    |   |   |   |    |   |   |   |   |   |     |     |     |     |     |     |     |
| SimL      | MVVPDGWWS | RRHRG       | YAARIMSALD        | AG        | PT    | AVH     | WRGRPVP   | AGEFARTV | 47   |       |       |    |    |    |    |     |    |      |    |     |    |    |     |    |   |   |    |   |   |    |    |   |   |   |    |   |   |   |   |   |     |     |     |     |     |     |     |
| Consensus |           | y           |                   | p         |       |         | v         |          |      |       |       |    |    |    |    |     |    |      |    |     |    |    |     |    |   |   |    |   |   |    |    |   |   |   |    |   |   |   |   |   |     |     |     |     |     |     |     |
| BafY      | RS        | AAQGH       | QHAGGIDG          | .....     | GA    | VVA     | IL        | TVTN     | TAPT | VLR   | RYAAN | LA | 81 |    |    |     |    |      |    |     |    |    |     |    |   |   |    |   |   |    |    |   |   |   |    |   |   |   |   |   |     |     |     |     |     |     |     |
| Orf33     | TE        | AFH         | LDHSGVRAGD        | .....     | VVA   | IL      | VAPN      | SPEML    | TARY | AAH   | LL    | 86 |    |    |    |     |    |      |    |     |    |    |     |    |   |   |    |   |   |    |    |   |   |   |    |   |   |   |   |   |     |     |     |     |     |     |     |
| AusD1     | TG        | AA          | AGT               | RELGVGPGR | ..... | VVA     | IL        | VAPN     | SPDM | AV    | RYAVH | LL | 86 |    |    |     |    |      |    |     |    |    |     |    |   |   |    |   |   |    |    |   |   |   |    |   |   |   |   |   |     |     |     |     |     |     |     |
| MoeB4     | LT        | AAEL        | LRHFTEHRDPSAEGKAP |           | VVA   | IL      | TVTN      | SPATI    | IL   | RYAAN | LA    | 87 |    |    |    |     |    |      |    |     |    |    |     |    |   |   |    |   |   |    |    |   |   |   |    |   |   |   |   |   |     |     |     |     |     |     |     |
| SimL      | TG        | AA          | AGT               | RELGVGPGR | ..... | VVA     | IL        | VAPN     | SPDM | AV    | RYAVH | LL | 86 |    |    |     |    |      |    |     |    |    |     |    |   |   |    |   |   |    |    |   |   |   |    |   |   |   |   |   |     |     |     |     |     |     |     |
| Consensus |           | a           | l                 |           |       | vva     | l         | n        |      | rya   | l     |    |    |    |    |     |    |      |    |     |    |    |     |    |   |   |    |   |   |    |    |   |   |   |    |   |   |   |   |   |     |     |     |     |     |     |     |
| BafY      | GAT       | VVH         | HT                | NAV       | PADH  | LA      | DAK       | K        | LR   | ET    | GA    | TY | AV | DA | EN | LAT | AR | 128  |    |     |    |    |     |    |   |   |    |   |   |    |    |   |   |   |    |   |   |   |   |   |     |     |     |     |     |     |     |
| Orf33     | GG        | AVCY        | RS                | TNPGT     | SEVA  | PLD     | QQ        | IR       | LR   | DT    | EA    | V  | V  | Y  | T  | DA  | EN | APRA | AA | 133 |    |    |     |    |   |   |    |   |   |    |    |   |   |   |    |   |   |   |   |   |     |     |     |     |     |     |     |
| AusD1     | GG        | AVCY        | RS                | TNPGT     | TS    | HSV     | LS        | EA       | Q    | LR    | LD    | TS | AT | VL | FT | DR  | EA | AR   | AL | 133 |    |    |     |    |   |   |    |   |   |    |    |   |   |   |    |   |   |   |   |   |     |     |     |     |     |     |     |
| MoeB4     | GAT       | LVH         | HS                | NAV       | P     | T       | DQ        | LA       | AA   | R     | D     | L  | SK | T  | GA | T   | FL | AV   | DK | EN  | LD | AA | 134 |    |   |   |    |   |   |    |    |   |   |   |    |   |   |   |   |   |     |     |     |     |     |     |     |
| SimL      | GG        | AVCY        | RS                | TNPGT     | TS    | HSV     | LS        | EA       | Q    | LR    | LD    | TS | AT | VL | FT | DR  | EA | AR   | AL | 133 |    |    |     |    |   |   |    |   |   |    |    |   |   |   |    |   |   |   |   |   |     |     |     |     |     |     |     |
| Consensus | g         |             | l                 | tn        |       | l       | SA        | EA       | Q    | LR    | LD    | TS | AT | VL | FT | DR  | EA | AR   | AL |     |    |    |     |    |   |   |    |   |   |    |    |   |   |   |    |   |   |   |   |   |     |     |     |     |     |     |     |
| BafY      | EL        | R           | ER                | LG        | T     | PL      | T         | L        | A    | L     | D     | D  | L  | G  | P  | D   | V  | L    | D  | L   | T  | A  | G   | DP | D | A | L  | A | P | D  | A  | V | E | I | A  | P | D | R | P | A | V   | 175 |     |     |     |     |     |
| Orf33     | EL        | A           | A                 | G         | A     | S       | G         | ..       | L    | P     | V     | T  | C  | L  | T  | G   | E  | A    | R  | K   | R  | E  | S   | A  | E | D | .. | A | P | R  | A  | L | P | W | A  | P | D | A | L | L | 173 |     |     |     |     |     |     |
| AusD1     | L         | A           | D                 | R         | A     | R       | G         | R        | I    | A     | V     | T  | G  | S  | G  | V   | R  | G    | T  | G   | A  | V  | P   | P  | A | T | G  | A | R | .. | D  | V | A | A | V  | W | E | P | E | A | L   | 177 |     |     |     |     |     |
| MoeB4     | EL        | C           | D                 | R         | L     | P       | E         | P        | P    | R     | L     | A  | L  | G  | A  | L   | G  | P    | D  | V   | L  | D  | L   | S  | S | G | D  | P | D | A  | F  | G | H | D | A  | V | E | A | D | P | E   | Q   | P   | A   | V   | 181 |     |
| SimL      | L         | A           | D                 | R         | A     | R       | G         | R        | I    | A     | V     | T  | G  | S  | G  | V   | R  | G    | T  | G   | A  | V  | P   | P  | A | T | G  | A | R | .. | D  | V | A | A | V  | W | E | P | E | A | L   | 177 |     |     |     |     |     |
| Consensus | l         |             |                   |           |       |         |           |          |      |       |       |    |    |    |    |     |    |      |    |     |    |    |     |    |   |   |    |   |   |    |    |   |   |   |    |   |   |   |   |   |     |     |     |     |     |     |     |
| BafY      | V         | T           | Y                 | T         | S     | G       | T         | G        | E    | P     | K     | G  | A  | F  | D  | F   | R  | A    | R  | N   | G  | F  | I   | S  | A | G | L  | Q | M | G  | .. | W | R | S | V  | Y | L | A | C | L | P   | S   | 219 |     |     |     |     |
| Orf33     | I         | T           | F                 | T         | S     | G       | T         | G        | R    | P     | K     | G  | A  | R  | L  | A   | G  | R    | A  | W   | N  | G  | L   | V  | Q | M | V  | A | A | G  | E  | A | E | G | V  | K | L | L | V | T | P   | S   | 220 |     |     |     |     |
| AusD1     | I         | A           | F                 | T         | S     | G       | T         | G        | R    | P     | K     | G  | A  | S  | L  | P   | A  | R    | A  | W   | D  | S  | V   | S  | A | T | G  | A | S | I  | G  | E | G | D | R  | A | R | L | L | V | T   | P   | S   | 224 |     |     |     |
| MoeB4     | V         | I           | Y                 | T         | S     | G       | T         | G        | R    | P     | K     | G  | A  | T  | Q  | P   | Y  | R    | L  | R   | R  | A  | N   | L  | Q | V | A  | L | Q | S  | .. | E | P | I | V  | Y | L | S | T | L | P   | S   | 225 |     |     |     |     |
| SimL      | I         | A           | F                 | T         | S     | G       | T         | G        | R    | P     | K     | G  | A  | S  | L  | P   | A  | R    | A  | W   | D  | S  | V   | S  | A | T | G  | A | S | I  | G  | E | G | D | R  | A | R | L | L | V | T   | P   | S   | 224 |     |     |     |
| Consensus | tsg       | g           | pkg               |           |       |         |           |          |      |       | r     |    |    |    |    |     |    |      |    |     |    |    |     |    |   |   |    |   |   |    |    |   |   |   |    |   |   |   |   |   |     |     |     |     |     |     |     |
| BafY      | H         | S           | G                 | A         | T     | A       | D         | S        | L    | A     | S     | G  | S  | V  | L  | D   | G  | F    | D  | G   | D  | V  | L   | R  | C | V | E  | R | I | G  | I  | T | R | M | L  | S | P | P | Q | L | 266 |     |     |     |     |     |     |
| Orf33     | H         | T           | V                 | G         | S     | M       | A         | D        | T    | A     | L     | L  | G  | E  | V  | L   | H  | E    | N  | F   | N  | A  | E   | Q  | F | V | N  | T | V | A  | D  | E | G | I | A  | W | T | F | M | A | T   | V   | H   | L   | 267 |     |     |
| AusD1     | H         | T           | V                 | G         | P     | M       | A         | D        | A    | V     | L     | A  | G  | G  | A  | V   | H  | L    | E  | D   | L  | D  | A   | V  | L | R | T  | V | A | E  | H  | R | I | T | R  | T | F | L | A | T | H   | L   | 271 |     |     |     |     |
| MoeB4     | N         | S           | G                 | S         | A     | V       | D         | V        | A    | L     | A     | S  | G  | T  | V  | V   | L  | D    | G  | F   | E  | A  | G   | E  | V | L | R  | A | V | E  | Q  | H | R | V | S  | T | L | T | I | T | P   | P   | Q   | L   | 272 |     |     |
| SimL      | H         | T           | V                 | G         | P     | M       | A         | D        | A    | V     | L     | A  | G  | G  | A  | V   | H  | L    | E  | D   | L  | D  | A   | V  | L | R | T  | V | A | E  | H  | R | I | T | R  | T | F | L | A | T | H   | L   | 271 |     |     |     |     |
| Consensus | g         | d           | la                | gg        | v     | l       |           |          |      |       |       |    |    |    |    |     |    |      |    |     |    |    |     | v  |   |   |    |   |   |    |    |   |   |   |    |   |   |   |   |   |     |     |     |     |     |     |     |
| BafY      | Y         | L           | M                 | D         | H     | P       | E         | ..       | V    | D     | S     | T  | D  | L  | S  | S   | L  | T    | M  | V   | T  | Y  | V   | G  | C | P | A  | S | P | E  | R  | L | G | E | A  | V | K | V | F | G | D   | 307 |     |     |     |     |     |
| Orf33     | F         | Q           | L                 | D         | H     | L       | E         | E        | R    | G     | L     | K  | D  | V  | E  | E   | G  | R    | A  | P   | L  | Q  | R   | L  | I | Y | S  | G | S | A  | A  | P | A | R | I  | A | G | A | V | K | A   | F   | L   | 314 |     |     |     |
| AusD1     | Y         | R           | L                 | D         | H     | A       | R         | ..       | T    | E     | D     | H  | D  | L  | T  | S   | L  | R    | Q  | L   | I  | Y  | S   | G  | S | A | A  | P | A | R  | I  | A | E | A | N  | K | V | F | G | P | 312 |     |     |     |     |     |     |
| MoeB4     | Y         | M           | L                 | I         | D     | H       | P         | ..       | T    | A     | T     | T  | R  | S  | S  | I   | R  | L    | I  | T   | Y  | L  | G   | S  | P | A | A  | P | A | R  | L  | A | E | A | V  | E | V | F | G | P | 313 |     |     |     |     |     |     |
| SimL      | Y         | R           | L                 | D         | H     | A       | R         | ..       | T    | E     | D     | H  | D  | L  | T  | S   | L  | R    | Q  | L   | I  | Y  | S   | G  | S | A | A  | P | A | R  | I  | A | E | A | N  | K | V | F | G | P | 312 |     |     |     |     |     |     |
| Consensus | l         | dh          |                   |           |       |         |           |          |      |       |       |    |    |    |    |     |    |      |    |     |    |    |     |    |   |   |    |   |   |    |    |   |   |   |    |   |   |   |   |   |     |     |     |     |     |     |     |
| BafY      | V         | L           | I                 | Q         | V     | A       | T         | S        | E    | A     | C     | F  | V  | S  | M  | L   | S  | P    | A  | E   | H  | L  | D   | P  | R | L | R  | V | T | V  | G  | R | P | M | F  | G | W | R | I | T | D   | P   | E   | D   | 353 |     |     |
| Orf33     | I         | I           | V                 | Q         | A     | T       | G         | E        | T    | G     | R     | L  | T  | T  | L  | F   | P  | H    | E  | H   | L  | D  | P   | W  | L | S | T  | T | V | G  | R  | P | F | P | D  | V | E | V | V | G | D   | Q   | E   | S   | 361 |     |     |
| AusD1     | V         | L           | V                 | Q         | G     | Y       | C         | T        | S    | E     | G     | R  | I  | T  | L  | D   | P  | G    | D  | H   | Q  | D  | P   | S  | L | N | T  | V | G | R  | P  | F | F | E | V  | E | V | T | I | R | D   | P   | T   | 359 |     |     |     |
| MoeB4     | V         | L           | L                 | Q         | L     | Y       | C         | T        | E    | V     | N     | G  | I  | S  | M  | L   | M  | P    | Q  | D   | H  | F  | D   | P  | E | L | R  | R | T | V  | G  | R | P | T | .. | E | I | R | I | R | D   | V   | D   | 358 |     |     |     |
| SimL      | V         | L           | V                 | Q         | G     | Y       | C         | T        | S    | E     | G     | R  | I  | T  | L  | D   | P  | G    | D  | H   | Q  | D  | P   | S  | L | N | T  | V | G | R  | P  | F | F | E | V  | E | V | T | I | R | D   | P   | T   | 359 |     |     |     |
| Consensus | q         | y           | t                 | e         |       |         |           |          |      |       |       |    |    |    |    |     |    |      |    |     |    |    |     |    |   |   |    |   |   |    |    |   |   |   |    |   |   |   |   |   |     |     |     |     |     |     |     |
| BafY      | H         | R           | D                 | L         | P     | P       | E         | T        | G    | E     | V     | C  | V  | R  | S  | P   | F  | T    | M  | S   | E  | Y  | V   | A  | E | P | E  | L | T | A  | R  | T | V | R | D  | G | W | V | H | T | G   | D   | L   | G   | F   | V   | 400 |
| Orf33     | G         | A           | P                 | L         | A     | T       | G         | E        | V    | G     | E     | V  | R  | V  | R  | S   | P  | H    | M  | D   | G  | Y  | T   | G  | D | E | A  | A | T | A  | K  | V | L | R | D  | G | W | Y | H | T | G   | D   | I   | G   | Y   | T   | 408 |
| AusD1     | E         | R           | L                 | T         | T     | G       | T         | V        | G    | E     | V     | V  | R  | S  | P  | H   | V  | M    | A  | G   | Y  | W  | S   | D  | E | A | L  | S | A | R  | V  | L | R | D | G  | W | Y | R | T | G | D   | I   | G   | R   | F   | 406 |     |
| MoeB4     | D         | R           | D                 | L         | P     | P       | E         | T        | G    | E     | V     | C  | V  | R  | S  | P   | S  | T    | M  | L   | G  | Y  | W   | G  | E | P | E  | L | T | A  | A  | I | T | R | D  | G | W | V | H | T | G   | D   | L   | G   | S   | L   | 405 |
| SimL      | E         | R           | L                 | T         | T     | G       | T         | V        | G    | E     | V     | V  | R  | S  | P  | H   | V  | M    | A  | G   | Y  | W  | S   | D  | E | A | L  | S | A | R  | V  | L | R | D | G  | W | Y | R | T | G | D   | I   | G   | R   | F   | 406 |     |
| Consensus | l         | g           | ev                | v         | sp    | m       | y         | p        | a    | rdgw  | tdg   | g  |    |    |    |     |    |      |    |     |    |    |     |    |   |   |    |   |   |    |    |   |   |   |    |   |   |   |   |   |     |     |     |     |     |     |     |
| BafY      | D         | G           | D                 | G         | Y     | L       | L         | R        | G    | R     | I     | G  | E  | V  | T  | K   | N  | G    | I  | K   | I  | H  | P   | V  | T | V |    |   |   |    |    |   |   |   |    |   |   |   |   |   |     |     |     |     |     |     |     |

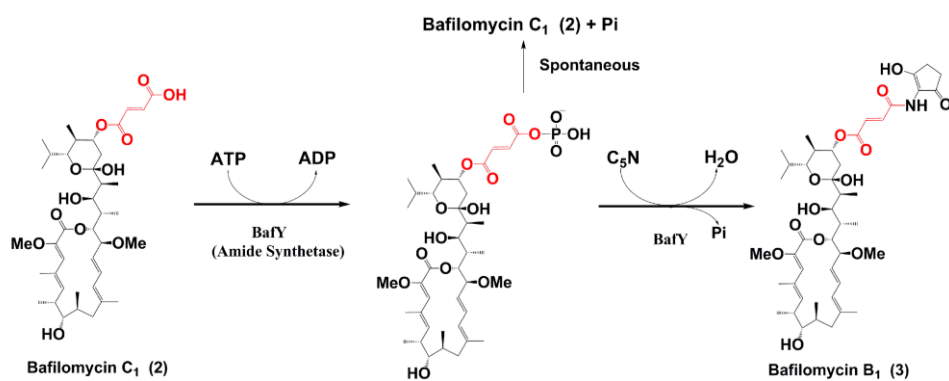

**Figure S13.** The proposed catalytic mechanism of BafY during the transformation from bafilomycin C<sub>1</sub> (2) to B<sub>1</sub> (3).

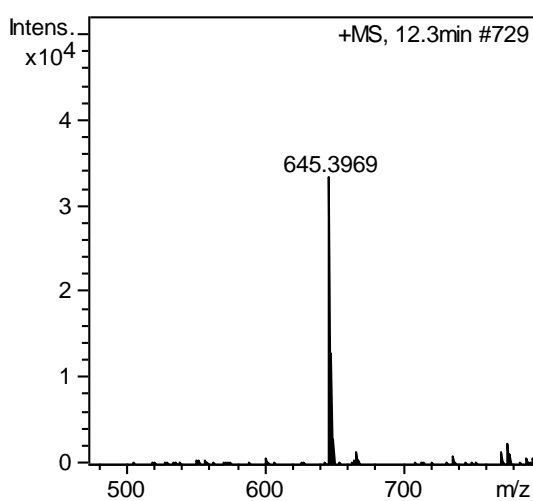

**Figure S14.** HRMS of bafilomycin A<sub>1</sub> (1) ( $[M+Na]^+$ : *obs.* 645.3969 *calc.* 645.3973)

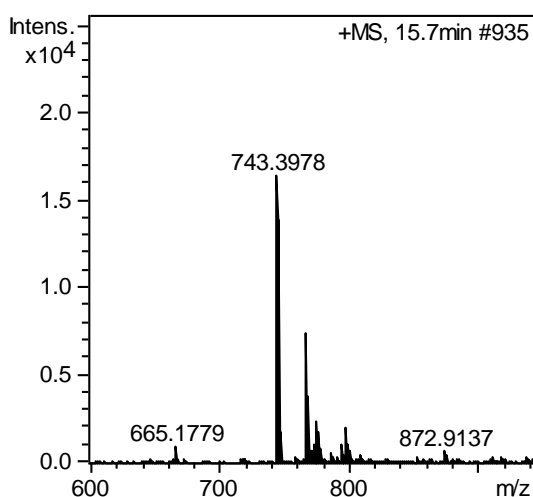

**Figure S15.** HRMS of bafilomycin C<sub>1</sub> (2) ( $[M+Na]^+$ : *obs.* 743.3977 *calc.* 743.3978)

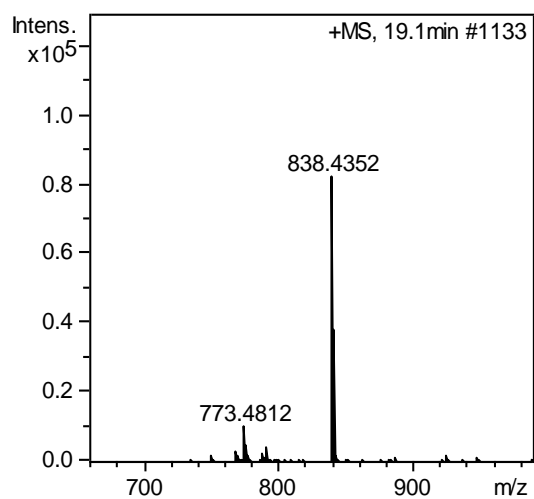

Figure S16. HRMS of bafilomycin B<sub>1</sub> (3) ([M+Na]<sup>+</sup>: *obs.* 838.4352 *calc.* 838.4352)

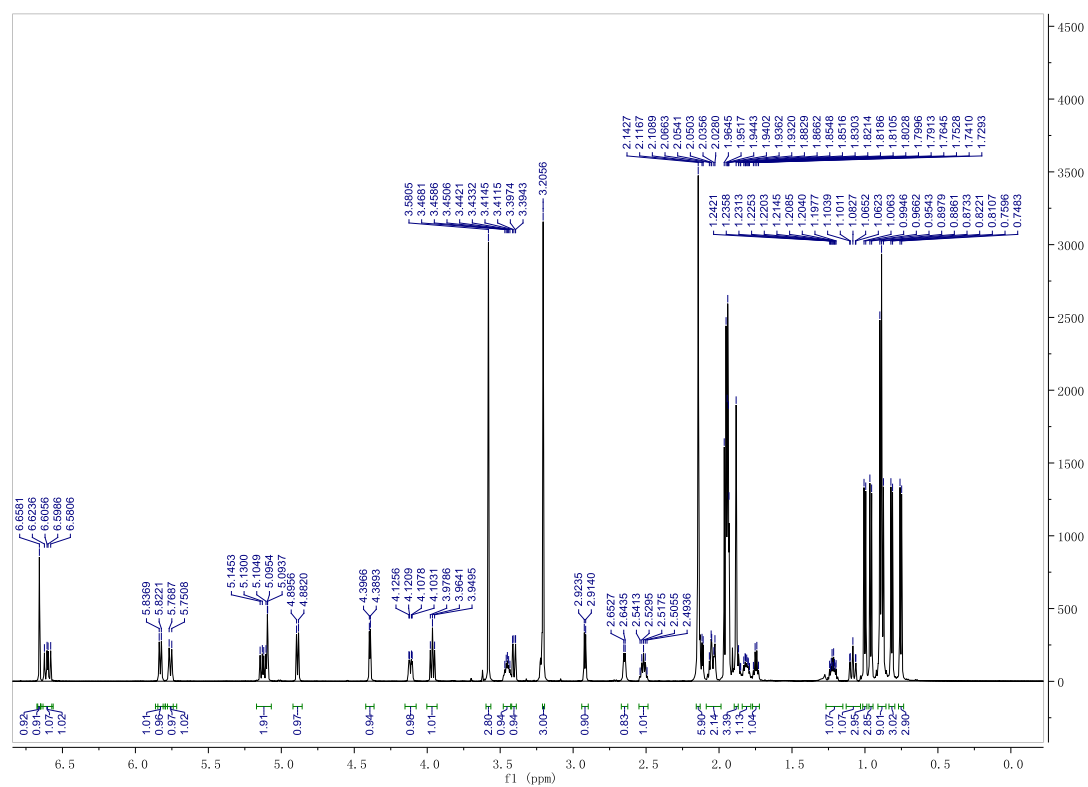

Figure S17. <sup>1</sup>H NMR spectrum of bafilomycin A<sub>1</sub> (1) in CD<sub>3</sub>CN.

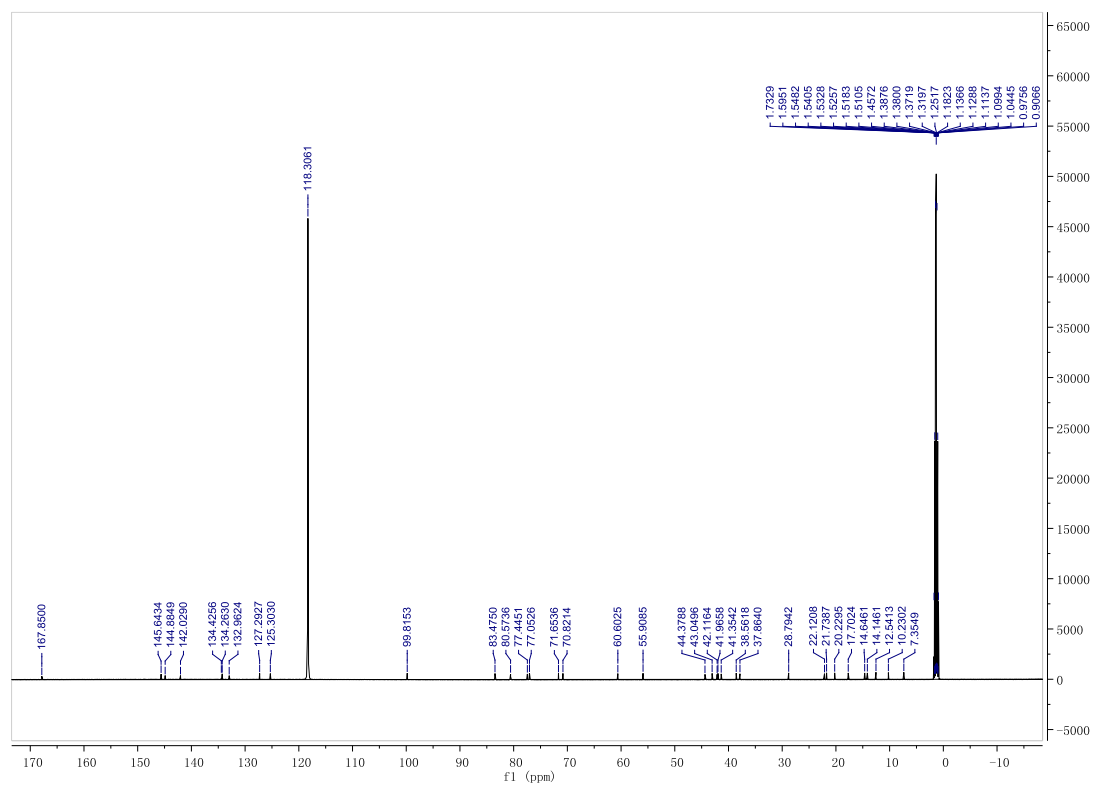

Figure S18.  $^{13}\text{C}$  NMR spectrum of bafilomycin  $\text{A}_1$  (1) in  $\text{CD}_3\text{CN}$ .

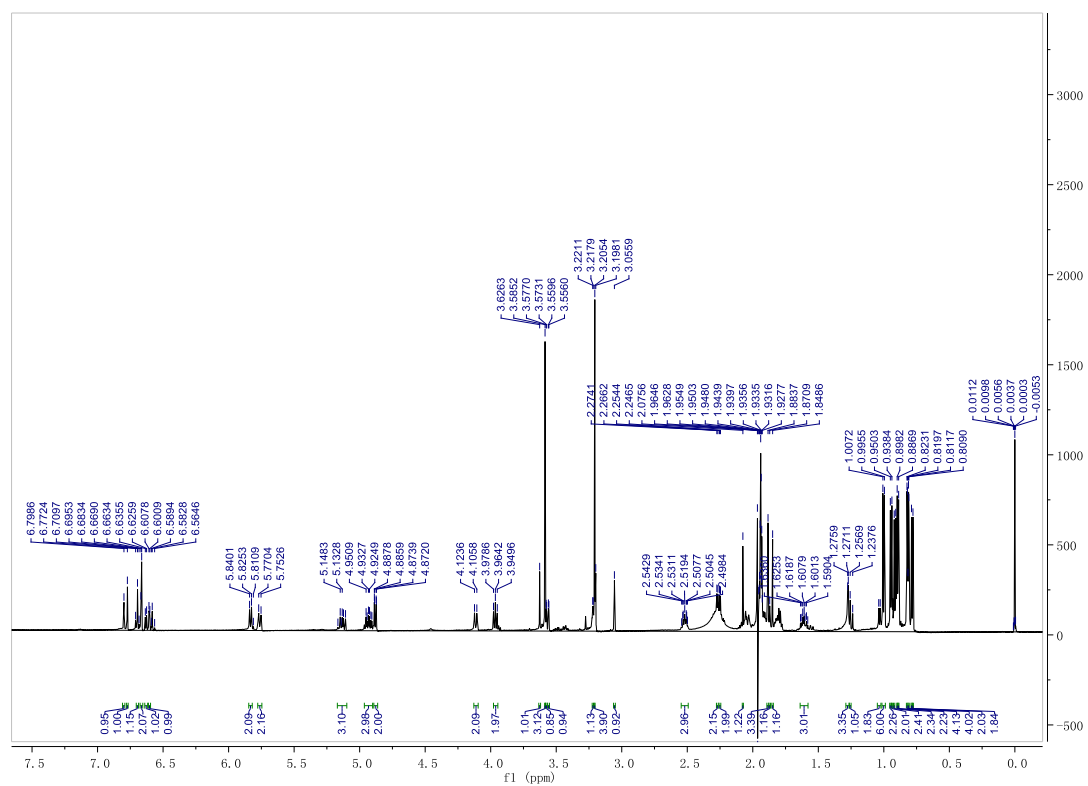

Figure S19.  $^1\text{H}$  NMR spectrum of bafilomycin  $\text{C}_1$  (2) in  $\text{CD}_3\text{CN}$ .

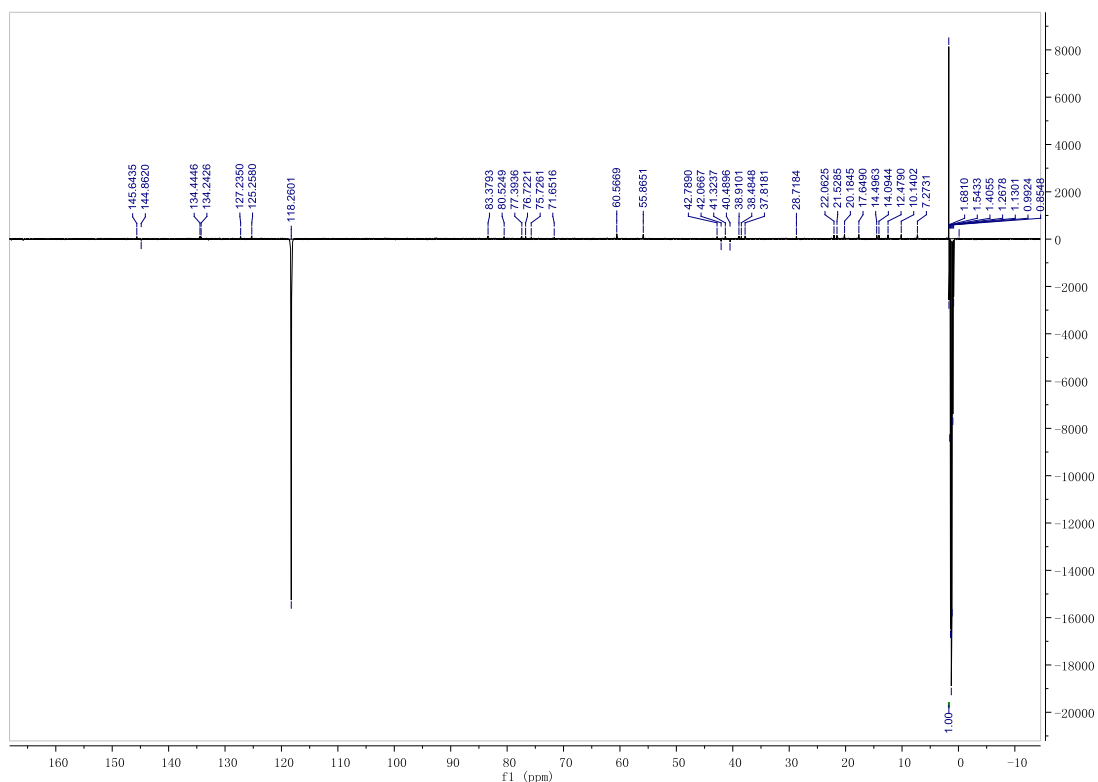

Figure S20.  $^{13}\text{C}$ -DEPTQ spectrum of bafilomycin  $\text{C}_1$  (2) in  $\text{CD}_3\text{CN}$ .

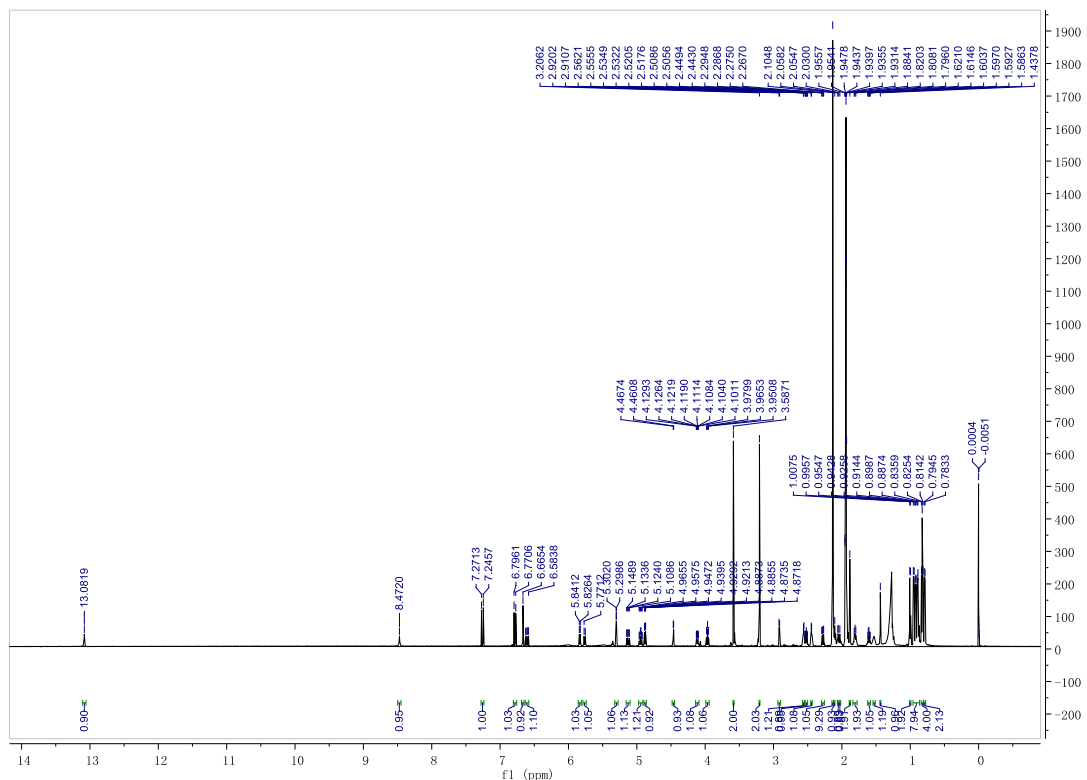

Figure S21.  $^1\text{H}$  NMR spectrum of bafilomycin  $\text{B}_1$  (3) in  $\text{CD}_3\text{CN}$ .

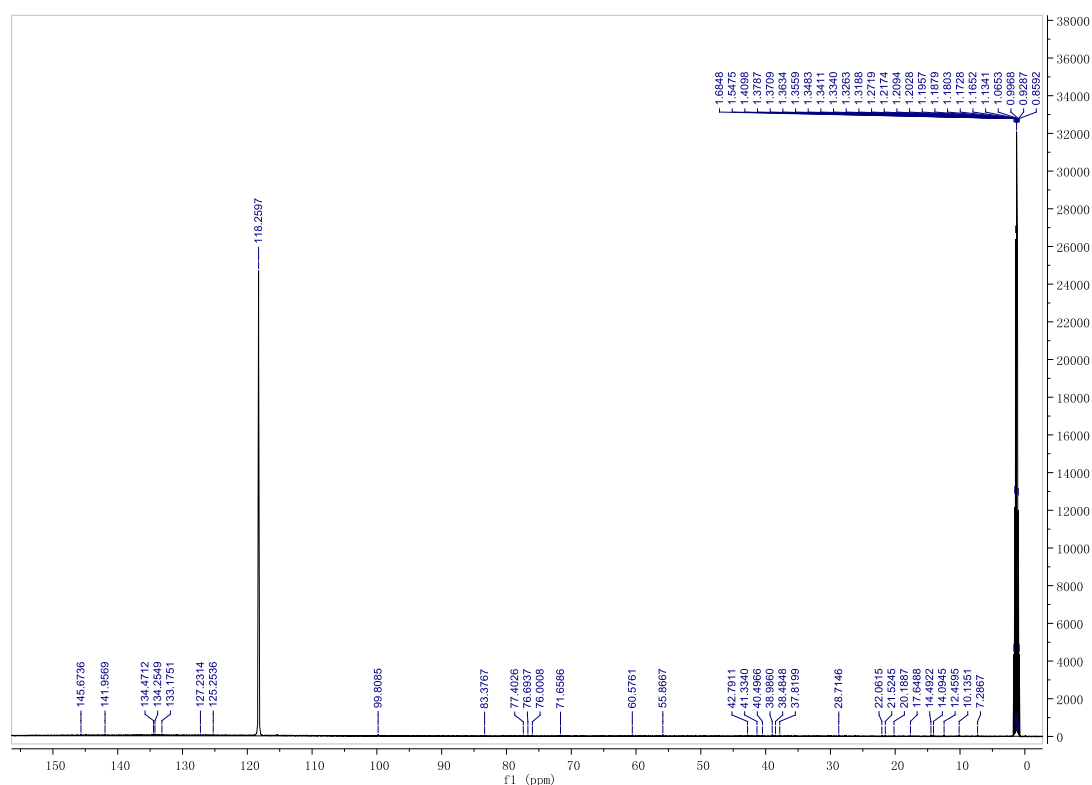

**Figure S22.** <sup>13</sup>C NMR spectrum of bafilomycin B<sub>1</sub> (3) in CD<sub>3</sub>CN.

**Table S1.** The conversion percentages of 1 to 2 (fumarate as substrate) or 4 (succinate as substrate) by Orf2 (10 μM) and Orf3 (10 μM) at 28 °C for 4 h.

| Compound | Conversion Percentage |
|----------|-----------------------|
| 2        | 83.1 ± 3.2%           |
| 4        | 2.2 ± 0.1%            |

*Note:* The conversion percentages were calculated based on substrate consumption.

**Table S2. The primers for construction of knock-out vectors and PCR confirmation of *S. lohii* mutants.**

| Primers                          | Sequence (5'-3')                               |
|----------------------------------|------------------------------------------------|
| <i>ΔbafY</i> -left arm-FP        | AAAAGCTTCCATGGGCACGCCCTAGGTCCCGCCAGATTCCGTCCA  |
| <i>ΔbafY</i> -left arm-RP        | CCAAAATCCCTTAACGTGAGCCTAGGCGGCGGAGATGAAGCCGT   |
| <i>ΔbafY</i> -right arm-FP       | CTCGCCAGTCGATTGGCTGACAATTGGGATCACCGACCCGGAGGA  |
| <i>ΔbafY</i> -right arm-RP       | CCAAGCTTGCTAGCAGATGTCAATTGTCATGCCGTCTCCTGTGCT  |
| <i>Δorf2&amp;3</i> -left arm-FP  | AAGAGCTTTTATAAAAGCTTCCATGGCGTAAGGGATGCTCCCGCA  |
| <i>Δorf2&amp;3</i> -left arm-RP  | AACGTGAGCCTAGGGCGTGCCATGGGCCGAACAGGTACCCCAGAC  |
| <i>Δorf2&amp;3</i> -right arm-FP | TTGGCTGACAATTGACATCTGCTAGCGTCGACAGGAGCGACCTCTC |
| <i>Δorf2&amp;3</i> -right arm-RP | GTGGATCCGCACCCAAGCTTGCTAGCGCGTACGCCTTCCAGCTC   |
| <i>ΔbafY</i> -KO-FP              | CGTGCCTCGTCCCACAGTT                            |
| <i>ΔbafY</i> -KO-RP              | ATCACTTCGATGGCGCGGC                            |
| <i>Δorf2&amp;3</i> -KO-FP        | GGAGGAAGAGGTCCCTCGTG                           |
| <i>Δorf2&amp;3</i> -KO-RP        | ACTGCCCCCTCCATTCACA                            |

**Table S3. The primers for construction of protein expression vectors.**

| Primers         | Sequence (5'-3')                                        |
|-----------------|---------------------------------------------------------|
| BafX-NdeI-FP    | GCCGGA <u>AATTC</u> CGTGACCCTCTCCGTGGCGT                |
| BafX-HindIII-RP | ATGCA <u>AAGCTT</u> TGGCAGACCTACGGGAGGAAATCG            |
| BafY-EcoRI-FP   | GCCGGA <u>AATTC</u> TATGCCGTCGAACGAAACGT                |
| BafY-HindIII-RP | ATGCA <u>AAGCTT</u> CCACAGTTCCGCGGTAGGTG                |
| Orf2-NdeI-FP    | GGAATTC <u>CATATG</u> AGTCTGGGGTACCTG                   |
| Orf2-EcoRI-RP   | GGAATTC <u>CACGGC</u> AGGGCCGGGGC                       |
| Orf3-NdeI-FP    | CCTGGT GCCCGCGGCAGCC <u>CATATG</u> ACCGCCGCCACCCGCGC    |
| Orf3-NdeI-RP    | GTCCACCAGTCATGCTAGCC <u>CATATG</u> TCAGTAGAGGCCCTCGGGCG |

*Note:* The underline letters indicate the restriction sites.
